# Supplementary material
Source: MDPI journal article supplement (https://www.mdpi.com/2072-4292/13/19/3965)
Supplement: s1 [file s1]

## Group-Wise Summary

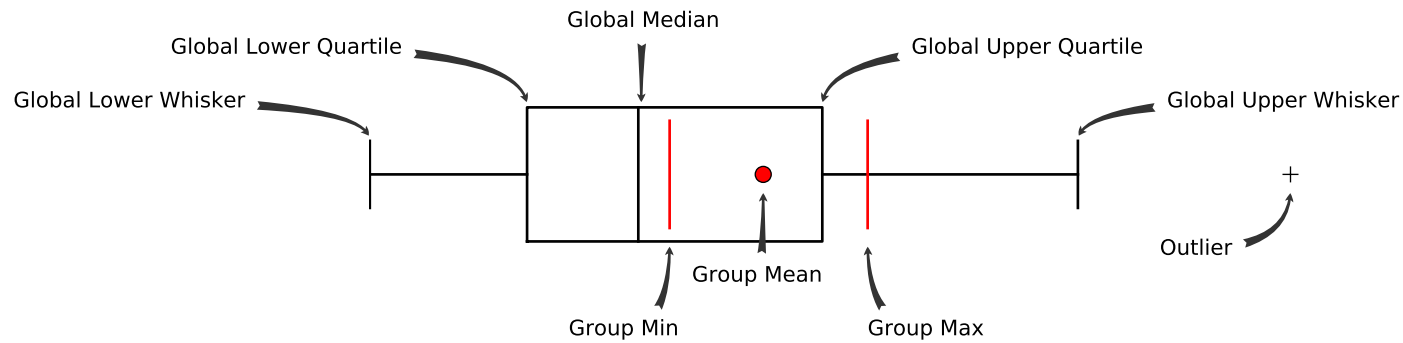

**Overall Variable Statistics: Count = 892; Std. Distance = 557.2834; SSD = 2186.0809**

| Variable   | Mean     | Std. Dev. | Min      | Max       | R2     |
|------------|----------|-----------|----------|-----------|--------|
| LONG       | 50.7655  | 2.3889    | 48.0830  | 56.0200   | 0.7203 |
| PREC_MM    | 39.6805  | 53.9826   | -86.7000 | 199.3500  | 0.5625 |
| SRTM_ELEVA | 946.1155 | 554.6567  | -5.0000  | 2575.0000 | 0.5309 |
| TNPI_GROWT | 0.0126   | 0.0416    | -0.0954  | 0.1215    | 0.4424 |
| TNPI_LST_M | -2.0399  | 0.9361    | -4.6656  | 0.6304    | 0.2932 |

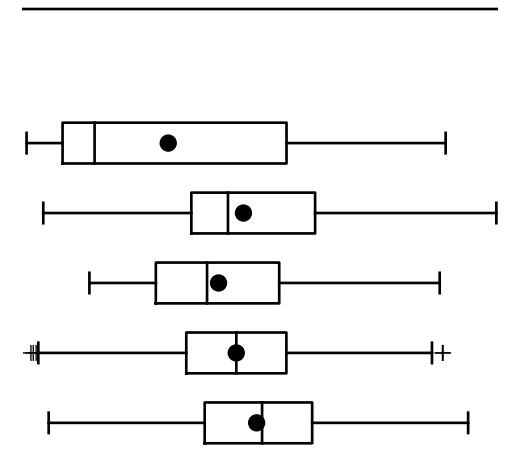

**Group 1: Count = 156; Std. Distance = 376.7474; SSD = 483.3004**

| Variable   | Mean      | Std. Dev. | Min      | Max       | Share  |
|------------|-----------|-----------|----------|-----------|--------|
| LONG       | 49.8980   | 1.6756    | 48.1150  | 55.0120   | 0.8690 |
| PREC_MM    | 41.0029   | 37.5455   | -67.1100 | 106.6900  | 0.6076 |
| SRTM_ELEVA | 1590.0064 | 374.8668  | 694.0000 | 2575.0000 | 0.7291 |
| TNPI_GROWT | 0.0426    | 0.0308    | -0.0198  | 0.1143    | 0.6182 |
| TNPI_LST_M | -2.3185   | 0.9896    | -4.6656  | 0.5611    | 0.9869 |

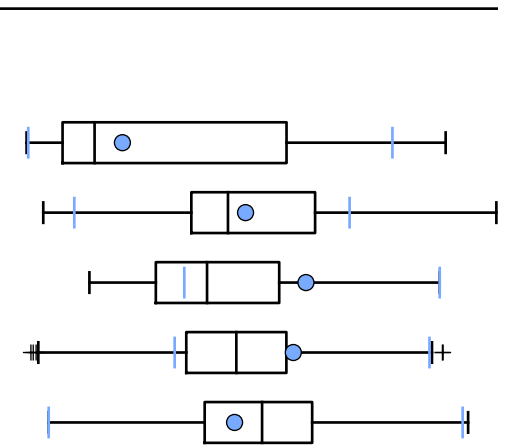

## Group-Wise Summary (cont.)

**Group 2: Count = 183; Std. Distance = 269.1487; SSD = 354.8678**

| Variable   | Mean     | Std. Dev. | Min     | Max       | Share  |  |
|------------|----------|-----------|---------|-----------|--------|--|
| LONG       | 49.5024  | 1.4004    | 48.3570 | 53.4500   | 0.6417 |  |
| PREC_MM    | 59.5142  | 34.1170   | 2.2000  | 162.0000  | 0.5586 |  |
| SRTM_ELEVA | 380.7486 | 266.9733  | -5.0000 | 1667.0000 | 0.6481 |  |
| TNPI_GROWT | 0.0422   | 0.0323    | -0.0505 | 0.1211    | 0.7909 |  |
| TNPI_LST_M | -1.1826  | 0.5619    | -2.7545 | 0.6304    | 0.6391 |  |

**Group 3: Count = 172; Std. Distance = 441.2441; SSD = 396.2148**

| Variable   | Mean      | Std. Dev. | Min      | Max       | Share  |  |
|------------|-----------|-----------|----------|-----------|--------|--|
| LONG       | 48.9069   | 0.6670    | 48.0830  | 52.1290   | 0.5098 |  |
| PREC_MM    | 23.9980   | 29.5663   | -21.2500 | 106.6900  | 0.4473 |  |
| SRTM_ELEVA | 1134.8953 | 440.2510  | 175.0000 | 2126.0000 | 0.7562 |  |
| TNPI_GROWT | -0.0323   | 0.0281    | -0.0954  | 0.0214    | 0.5385 |  |
| TNPI_LST_M | -1.9396   | 0.8581    | -4.2213  | 0.3276    | 0.8589 |  |

**Group 4: Count = 235; Std. Distance = 453.0111; SSD = 657.0507**

| Variable   | Mean      | Std. Dev. | Min      | Max       | Share  |  |
|------------|-----------|-----------|----------|-----------|--------|--|
| LONG       | 54.0920   | 1.0722    | 51.8540  | 56.0200   | 0.5249 |  |
| PREC_MM    | -10.1266  | 38.4380   | -86.7000 | 65.2400   | 0.5312 |  |
| SRTM_ELEVA | 1020.4553 | 451.3754  | 21.0000  | 2033.0000 | 0.7798 |  |
| TNPI_GROWT | 0.0007    | 0.0329    | -0.0915  | 0.1215    | 0.9821 |  |

## Group-Wise Summary (cont.)

| Variable                                                              | Mean     | Std. Dev. | Min     | Max       | Share  |                                                                                     |
|-----------------------------------------------------------------------|----------|-----------|---------|-----------|--------|-------------------------------------------------------------------------------------|
| TNPI_LST_M                                                            | -2.6252  | 0.8366    | -4.6379 | 0.2056    | 0.9145 | 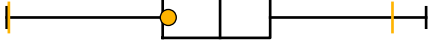 |
| <b>Group 5: Count = 146; Std. Distance = 295.6661; SSD = 294.6472</b> |          |           |         |           |        | <hr/>                                                                               |
| Variable                                                              | Mean     | Std. Dev. | Min     | Max       | Share  |                                                                                     |
| LONG                                                                  | 50.1108  | 1.3854    | 48.7500 | 52.6890   | 0.4963 |  |
| PREC_MM                                                               | 112.0516 | 37.6256   | 26.8500 | 199.3500  | 0.6030 |  |
| SRTM_ELEVA                                                            | 624.7123 | 293.2584  | 48.0000 | 1391.0000 | 0.5205 |  |
| TNPI_GROWT                                                            | 0.0155   | 0.0300    | -0.0787 | 0.0885    | 0.7710 |  |
| TNPI_LST_M                                                            | -1.9927  | 0.5903    | -3.5011 | -0.3470   | 0.5956 |  |

## Variable-Wise Summary

**LONG: R2 = 0.72**

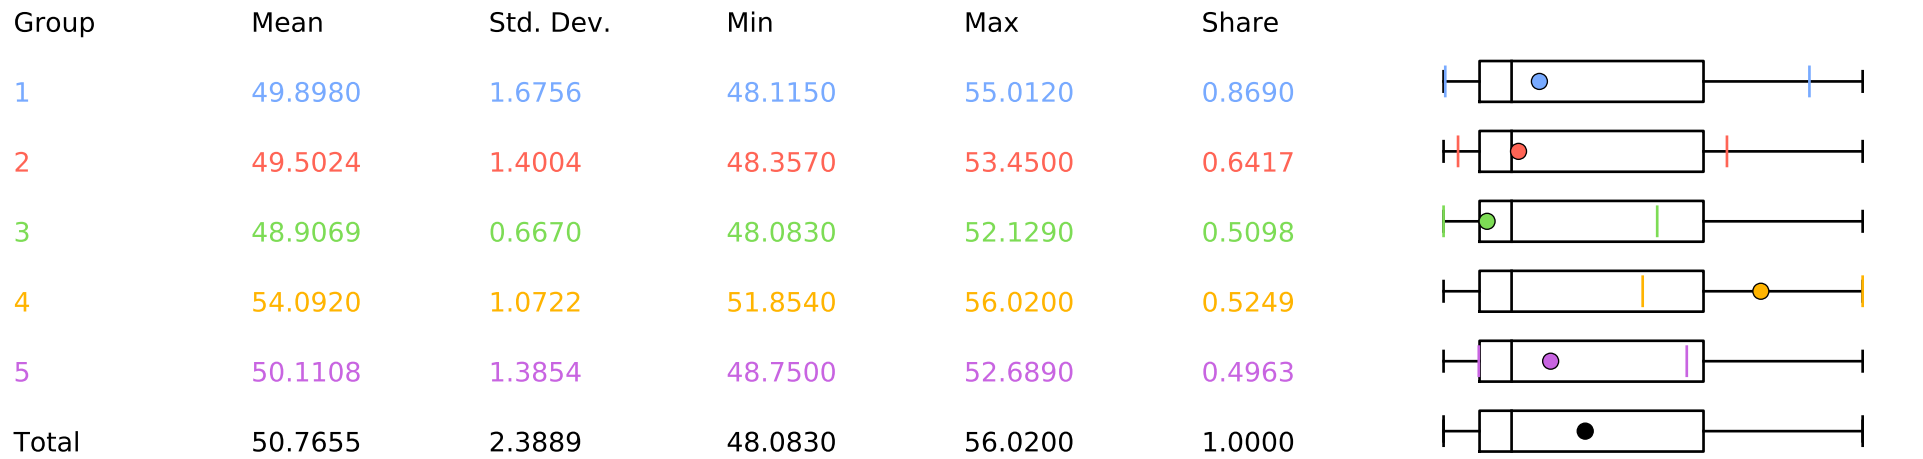

**PREC\_MM: R2 = 0.56**

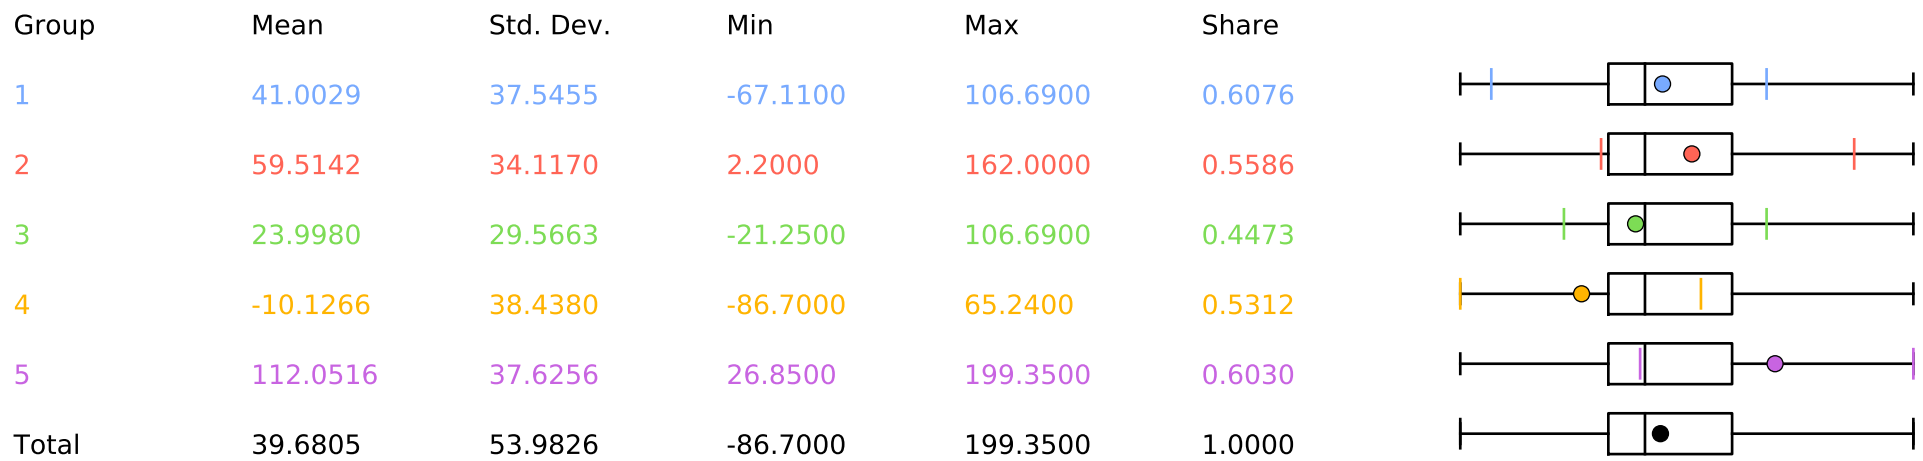

**SRTM\_ELEVA: R2 = 0.53**

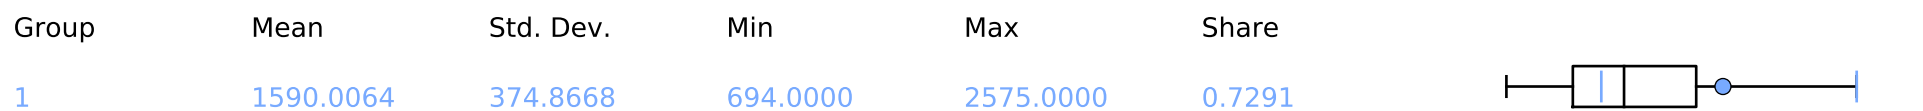

## Variable-Wise Summary (cont.)

| Group | Mean      | Std. Dev. | Min      | Max       | Share  |  |
|-------|-----------|-----------|----------|-----------|--------|--|
| 2     | 380.7486  | 266.9733  | -5.0000  | 1667.0000 | 0.6481 |  |
| 3     | 1134.8953 | 440.2510  | 175.0000 | 2126.0000 | 0.7562 |  |
| 4     | 1020.4553 | 451.3754  | 21.0000  | 2033.0000 | 0.7798 |  |
| 5     | 624.7123  | 293.2584  | 48.0000  | 1391.0000 | 0.5205 |  |
| Total | 946.1155  | 554.6567  | -5.0000  | 2575.0000 | 1.0000 |  |

**TNPI\_GROWT: R2 = 0.44**

| Group | Mean    | Std. Dev. | Min     | Max    | Share  |  |
|-------|---------|-----------|---------|--------|--------|--|
| 1     | 0.0426  | 0.0308    | -0.0198 | 0.1143 | 0.6182 |  |
| 2     | 0.0422  | 0.0323    | -0.0505 | 0.1211 | 0.7909 |  |
| 3     | -0.0323 | 0.0281    | -0.0954 | 0.0214 | 0.5385 |  |
| 4     | 0.0007  | 0.0329    | -0.0915 | 0.1215 | 0.9821 |  |
| 5     | 0.0155  | 0.0300    | -0.0787 | 0.0885 | 0.7710 |  |
| Total | 0.0126  | 0.0416    | -0.0954 | 0.1215 | 1.0000 |  |

**TNPI\_LST\_M: R2 = 0.29**

| Group | Mean    | Std. Dev. | Min     | Max    | Share  |  |
|-------|---------|-----------|---------|--------|--------|--|
| 1     | -2.3185 | 0.9896    | -4.6656 | 0.5611 | 0.9869 |  |
| 2     | -1.1826 | 0.5619    | -2.7545 | 0.6304 | 0.6391 |  |
| 3     | -1.9396 | 0.8581    | -4.2213 | 0.3276 | 0.8589 |  |

Variable-Wise Summary (cont.)

| Group | Mean    | Std. Dev. | Min     | Max     | Share  |                                                                                     |
|-------|---------|-----------|---------|---------|--------|-------------------------------------------------------------------------------------|
| 4     | -2.6252 | 0.8366    | -4.6379 | 0.2056  | 0.9145 |  |
| 5     | -1.9927 | 0.5903    | -3.5011 | -0.3470 | 0.5956 |  |
| Total | -2.0399 | 0.9361    | -4.6656 | 0.6304  | 1.0000 |  |

Parallel Box Plot

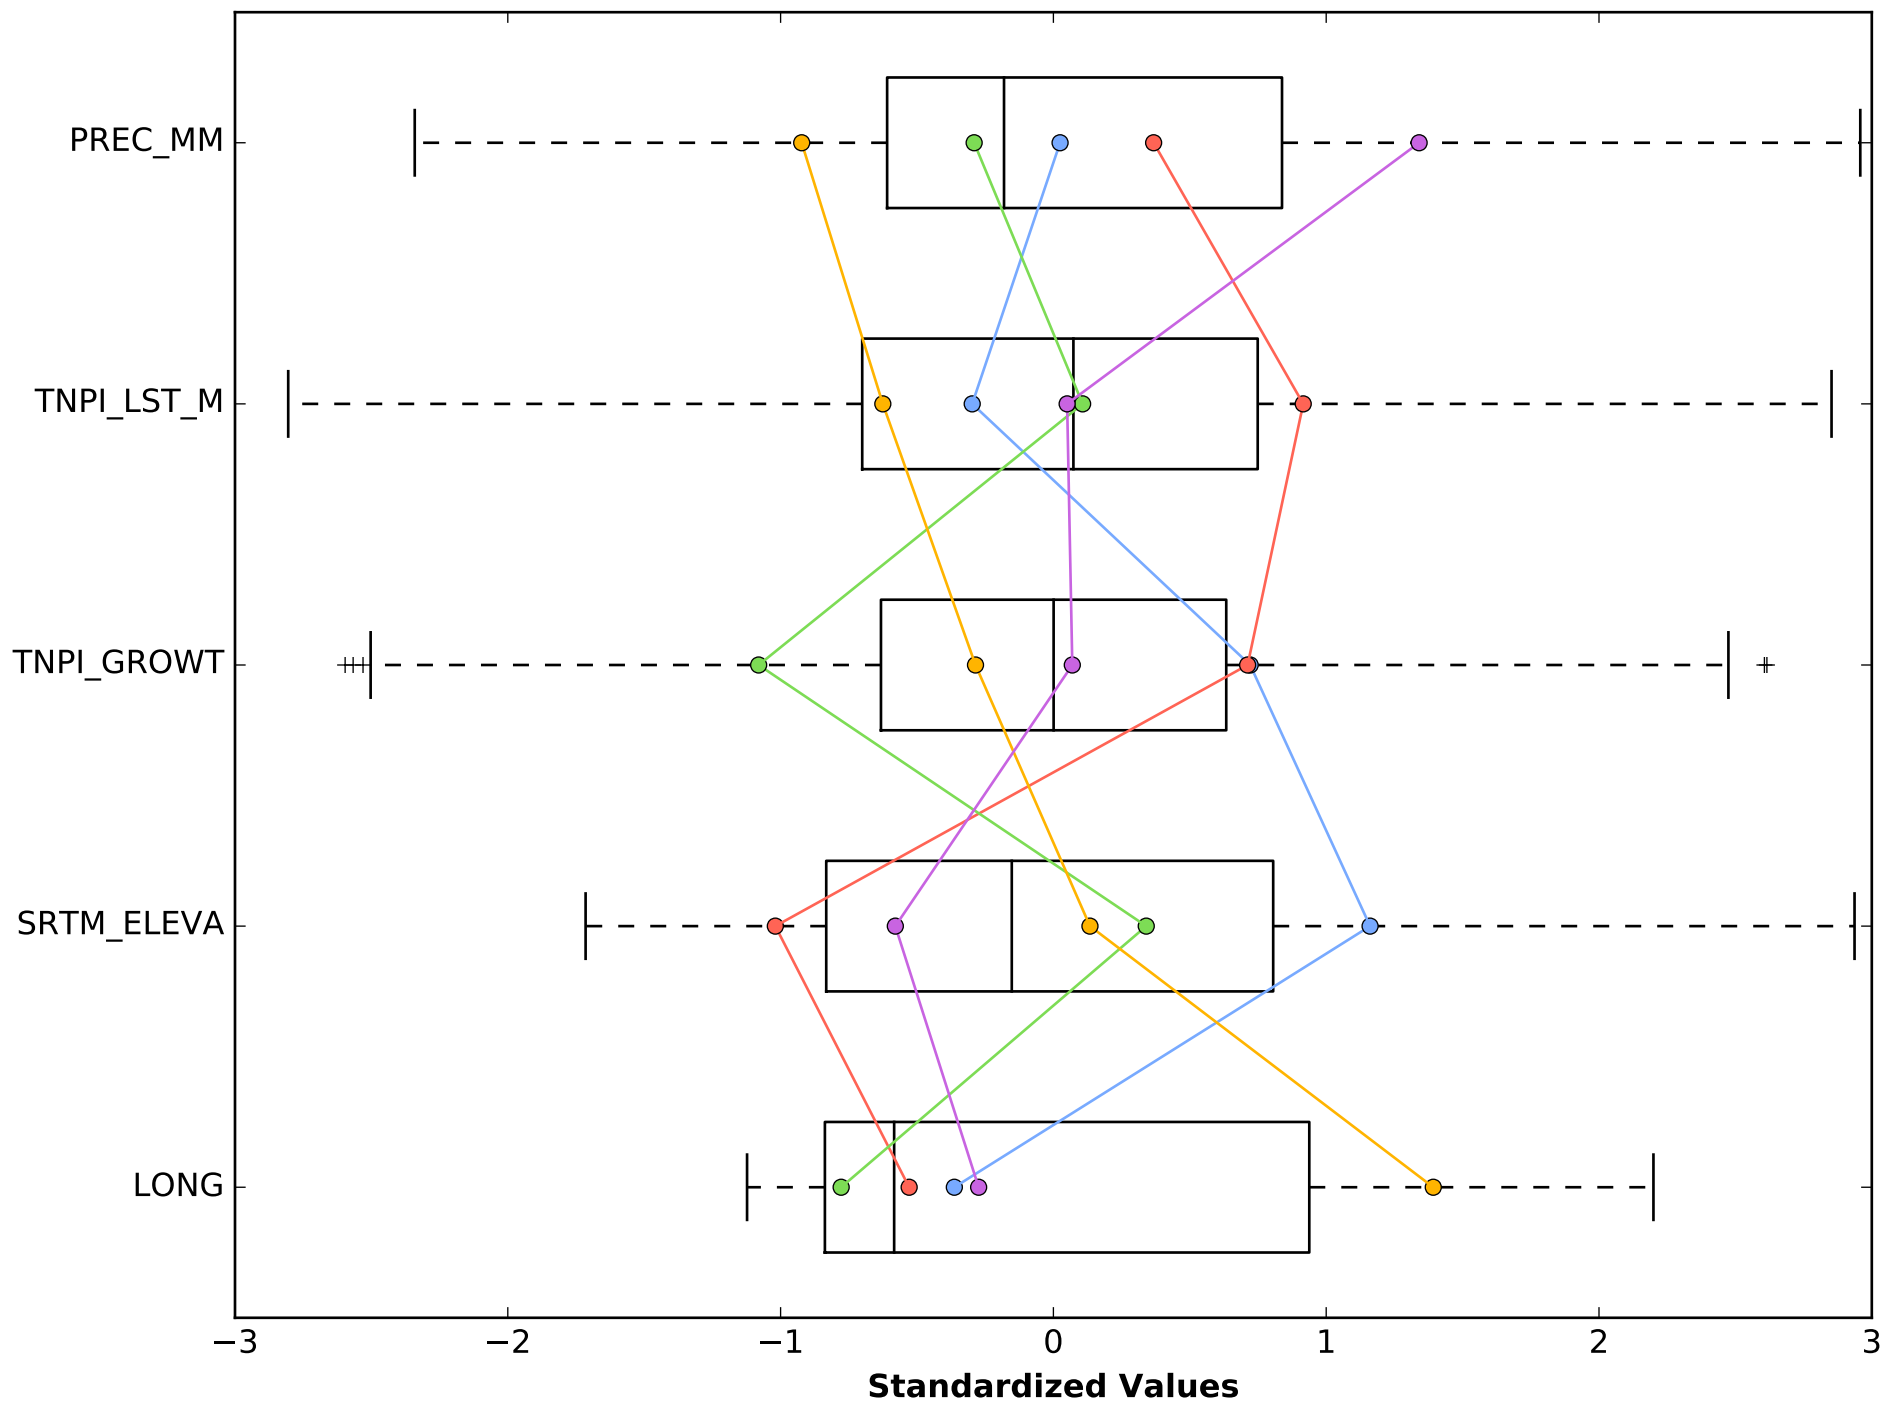

Grouping Analysis Parameters

| Parameter Name        | Input Value           |
|-----------------------|-----------------------|
| Input Features        | PP_Elev_LST_TNPI_WO   |
| Unique ID Field       | ID                    |
| Output Feature Class  | None                  |
| Analysis Fields       | LONG                  |
|                       | SRTM_ELEVA            |
|                       | TNPI_GROWT            |
|                       | TNPI_LST_M            |
|                       | PREC_MM               |
| Spatial Constraints   | NO_SPATIAL_CONSTRAINT |
| Distance Method       | EUCLIDEAN             |
| Number of Neighbors   | None                  |
| Weights Matrix File   | None                  |
| Initialization Method | FIND_SEED_LOCATIONS   |
| Initialization Field  | None                  |
| Selection Set         | False                 |
